# Supplementary material
Source: publisher figshare collection journal article supplement (https://acs.figshare.com/ndownloader/files/3907174)
Supplement: Supplementary file 1 [file 3907174]

# **Simple Control of Surface Topography of Gold Nanoshells by a Surfactant-less Seeded-Growth Method**

*Antonio Topete,<sup>a</sup> Manuel Alatorre-Meda,<sup>a,#</sup> Eva M. Villar-Álvarez,<sup>a</sup> Adriana Cambón,<sup>a</sup> Silvia Barbosa,<sup>a,\*</sup> Pablo Taboada,<sup>a,\*</sup> Víctor Mosquera<sup>a</sup>*

Grupo de Física de Coloides y Polímeros, Departamento de Física de la Materia Condensada, Universidad de Santiago de Compostela, Santiago de Compostela, 15782, Spain.

Authors to whom correspondence should be addressed: [silvia.barbosa@usc.es](mailto:silvia.barbosa@usc.es); [pablo.taboada@usc.es](mailto:pablo.taboada@usc.es)

<sup>#</sup>Present address: 3B's Research Group- Biomaterials, Biodegradables and Biomimetics, University of Minho, 4806-909, Guimarães, Portugal.

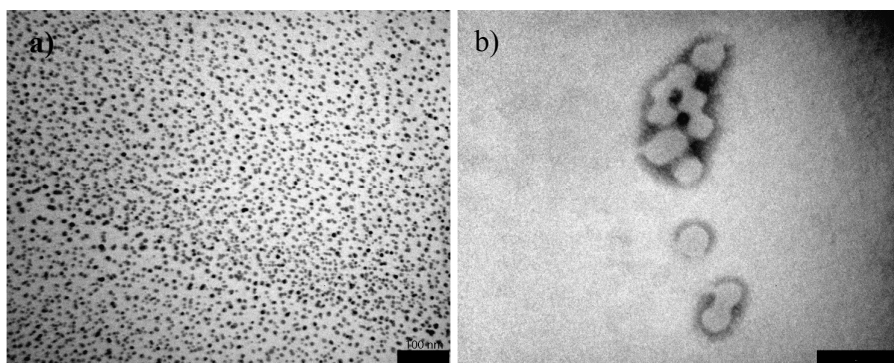

**Figure S1:** TEM images of a) citrate-capped Au seeds prepared by reduction with  $\text{NaBH}_4$ , and b) PLGA NPs stained with phosphotungstic acid. Scale bars are 200 nm.

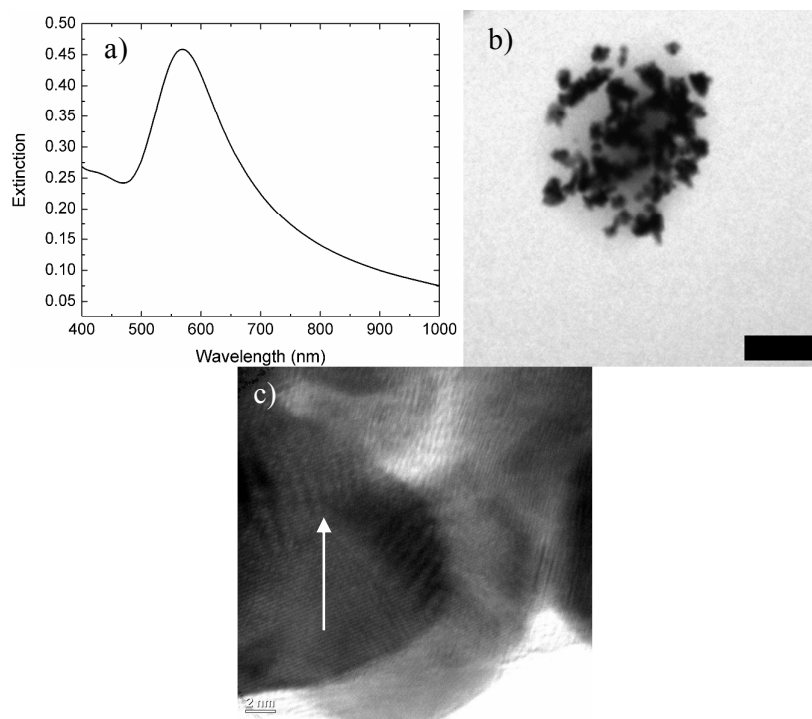

**Figure S2:** a) UV-vis extinction spectrum of NP-seed in the presence of Au growth solution and in the absence of AA after 1 day of reaction. Although chitosan by itself acts as reductant, its activity is not sufficient to generate fully-developed BGNS. b) TEM image of a NP-seed after 1 day under the aforementioned conditions (Scale bar is 50 nm). c) HR-TEM image showing the agglomeration of small flat crystals (as observed from the presence of Moiré patterns, see arrow) as precursors of branches.

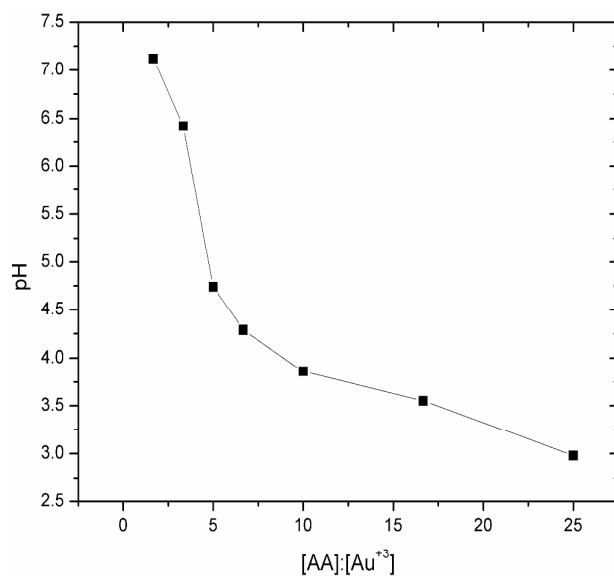

**Figure S3.** pH of the reaction solutions with different initial  $[AA]:[Au^{+3}]$  molar ratios of a 0.5 M AA solution. Initial pH of Au growth and AA solutions were 9.87 and 1.95, respectively.

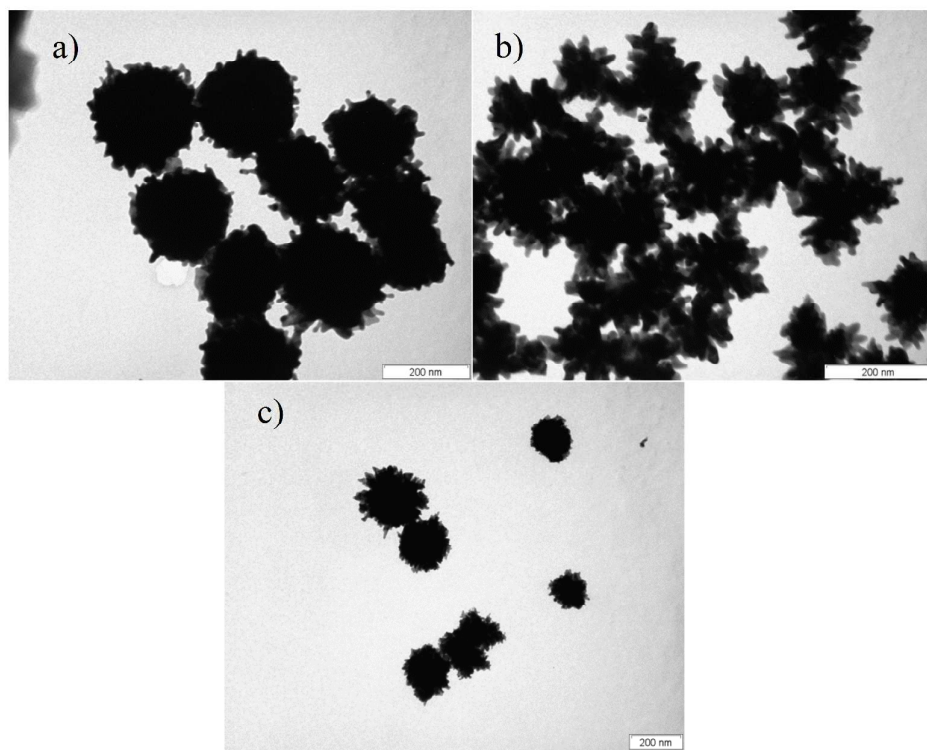

**Figure S4:** TEM images of Au nanoshells grown at different conditions: a) pH 4.0, 20  $\mu$ l; b) pH 7.0, 50  $\mu$ l; c) pH 7.0, 60  $\mu$ l of a 0.5 M AA solution.

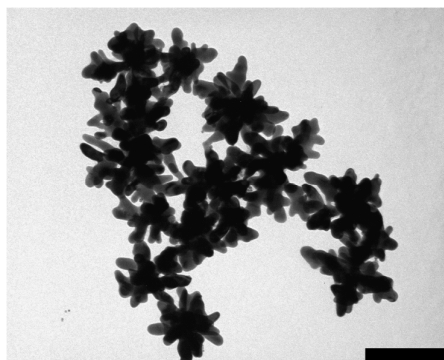

**Figure S5:** BGNS obtained after using 10  $\mu\text{L}$  of 0.25 M AA with a more branched structure. Scale bar is 200 nm.

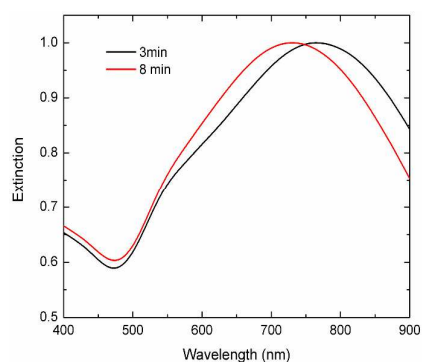

**Figure S6:** UV-vis extinction spectra of BGNS after 3 and 8 minutes of reaction. A slight blue shift of the plasmon peak is observed indicating that the structure undergoes a reshaping into a more thermodynamically stable geometry with a lower anisotropy degree. Reactants volumes were 2.5 mL of Au growth solution, 0.5 mL of NP-seed and 30  $\mu\text{L}$  of AA (0.5 M), respectively.

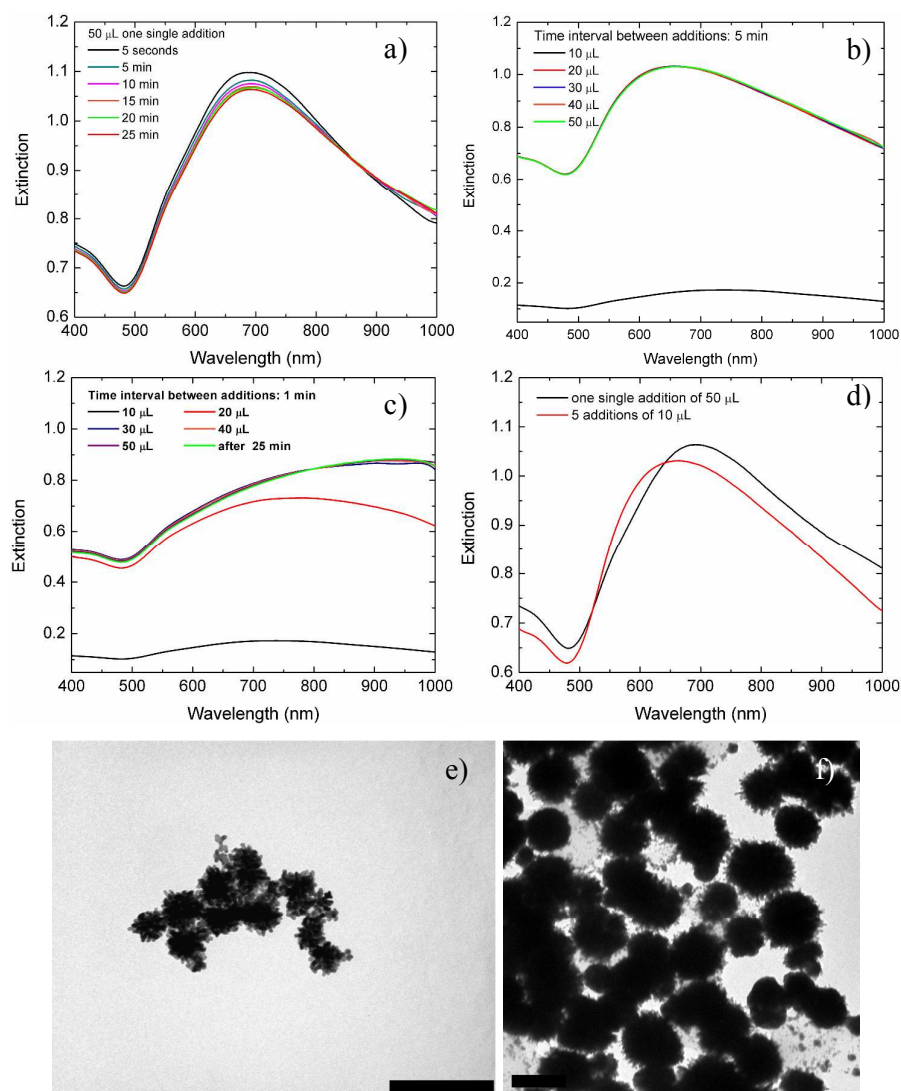

**Figure S7:** UV-vis spectra of BGNS: a) after one-off addition of 50  $\mu\text{L}$  of 0.5 M AA solution (spectra were measured after 5 s, 5, 10, 15, 20 and 25 min); b) after stepwise addition of 10  $\mu\text{L}$  each 5 min; c) after stepwise addition of 10  $\mu\text{L}$  each 1 min. d) Comparison of the spectra obtained after a single 50  $\mu\text{L}$  addition and 5 addition of 10  $\mu\text{L}$  aliquots of AA added each 5 min. e) TEM images of BGNS obtained after multiple additions of 10  $\mu\text{L}$  aliquots of AA and f) after a single addition of 50  $\mu\text{L}$ . Scale bar is 200 nm in e) and f).

**Estimation of SERS enhancement:** The estimate for the calculation of the SERS enhancement factor (EF) of the nanoshells inside HeLa cells compared to the bulk Raman signal was made through the equation:<sup>S1</sup>

$$EF = \frac{Vol_{bulk} \cdot T_{bulk} \cdot I_{bulk} \cdot SN_{SERS}}{Vol_{SERS} \cdot T_{SERS} \cdot I_{SERS} \cdot SN_{bulk}}$$

where  $EF$  is the enhancement factor estimate,  $Vol_{bulk}$  the total cellular volume probed by bulk native Raman;  $Vol_{SERS}$  the cytoplasmatic volume probed by SERS;  $T_{bulk}$  and  $T_{SERS}$  the acquisition for bulk Raman and SERS measurements in cells, respectively;  $I_{bulk}$  and  $I_{SERS}$  the laser power used for unenhanced Raman and SERS measurements, respectively; and  $SN_{bulk}$  and  $SN_{SERS}$  the signal to noise ratio for unenhanced nad SERS spectra, respectively.

## References

1. Ochsenkühn, M. A.; Jess, P. R. T.; Stoquert, H.; Dholakaia, K.; Campbell, C. J. Nanoshells for Surface-enhanced Raman Spectroscopy in Eukaryotic Cells: Cellular Response and Sensor Development. *ACS Nano* **2009**, 3, 3613-3621.
